# Supplementary material
Source: PubMed Central journal article supplement (PMC6295233)

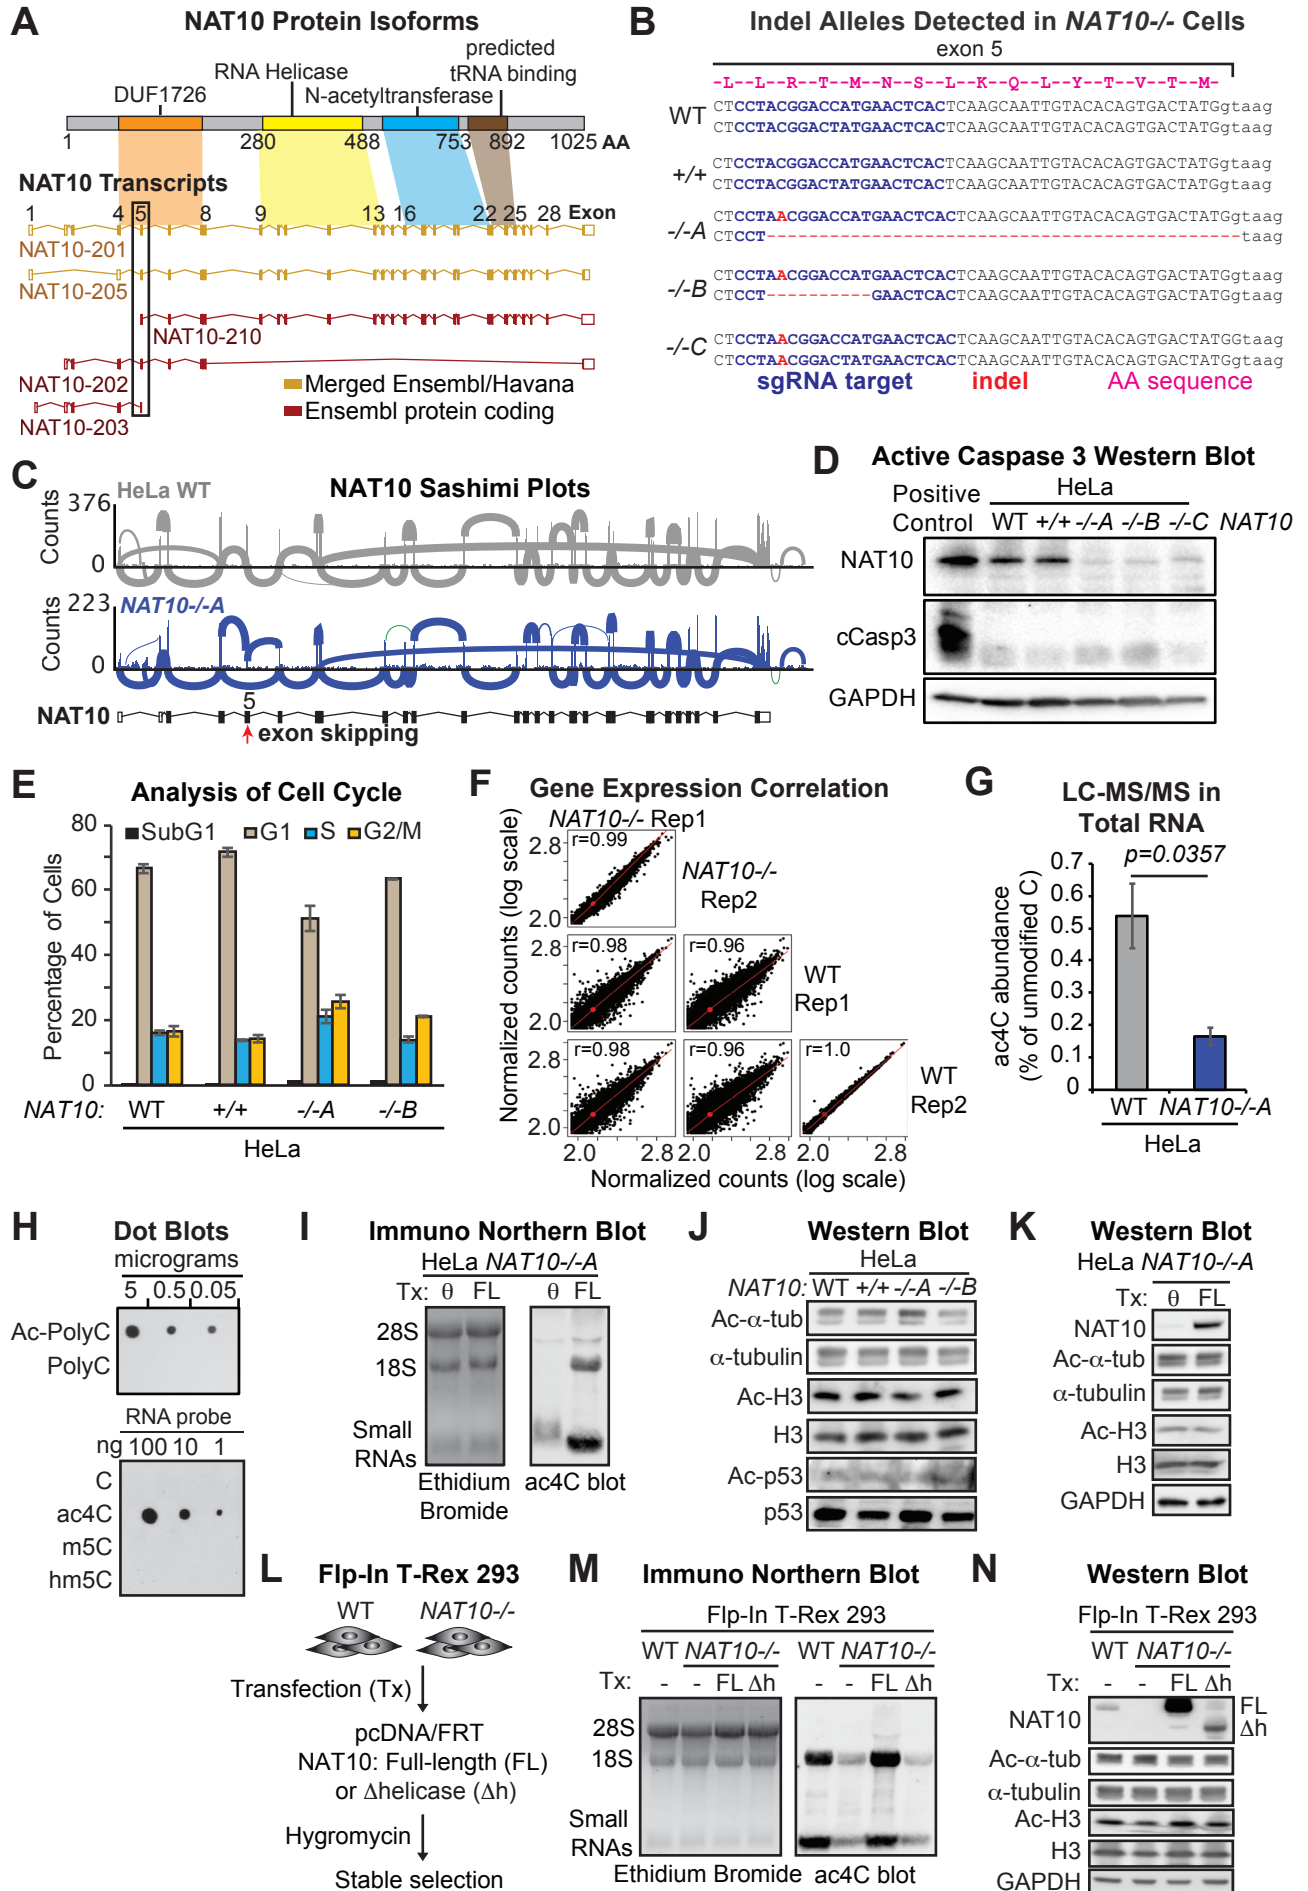

# Arango et al., Figure S2, related to Figure 2

## A Bioanalyzer Profiles

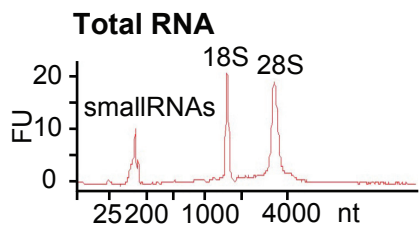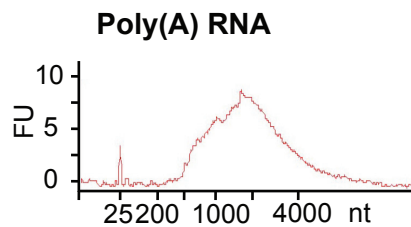

## B LC-MS/MS Chromatograms

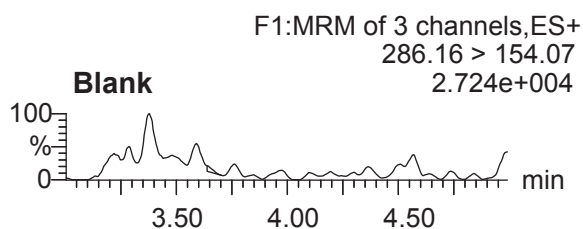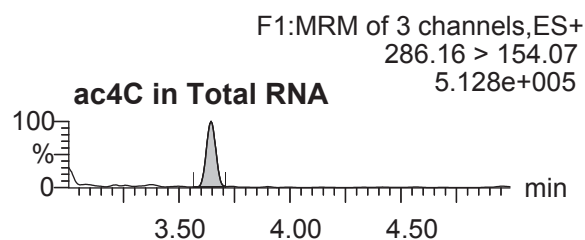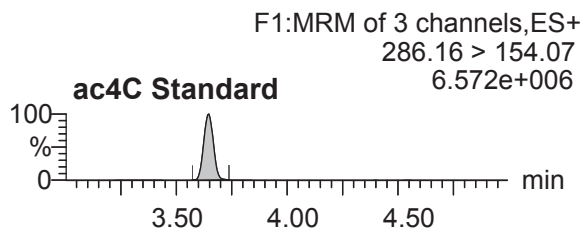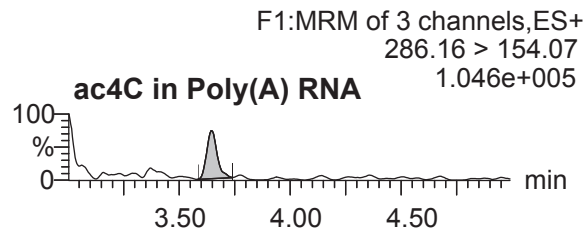

**A** acRIP RT-qPCR

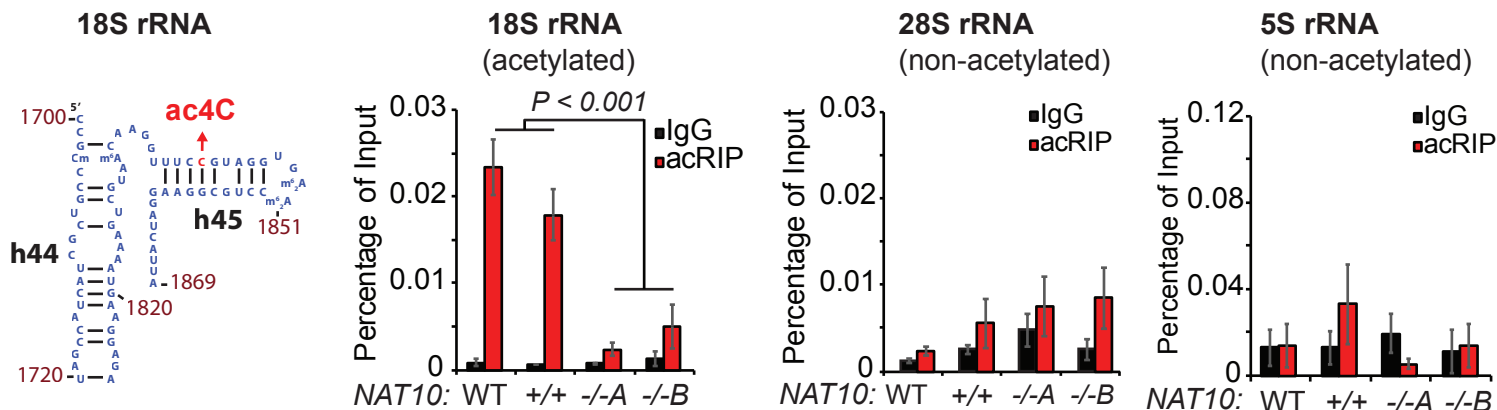

**B** Acetylated Spike-in Recovery in acRIP-seq

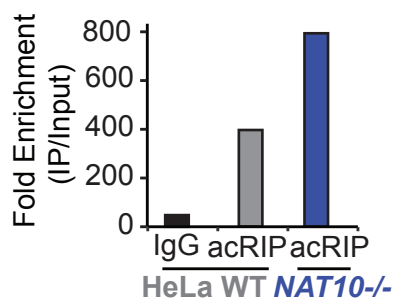

**C** acRIP-seq Browser Shots of 28S rRNA

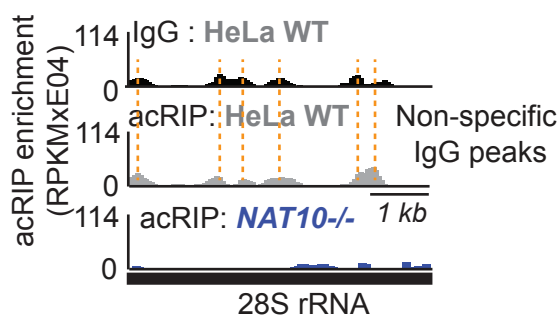

**D** ac4C Summits per Gene

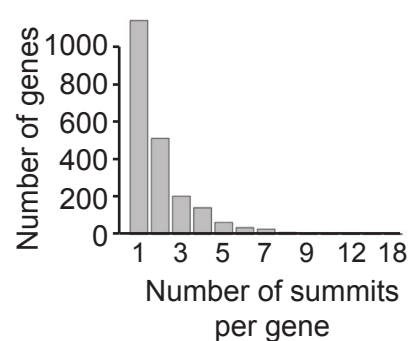

**E** RT-qPCR Validation of acRIP-seq Browser shots (mapped to transcriptome)

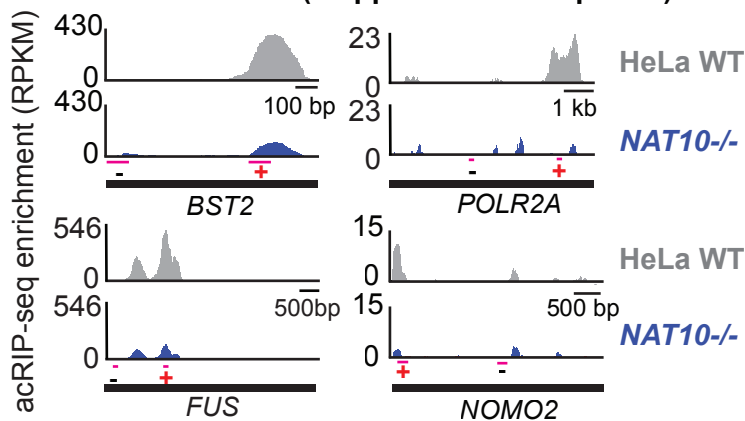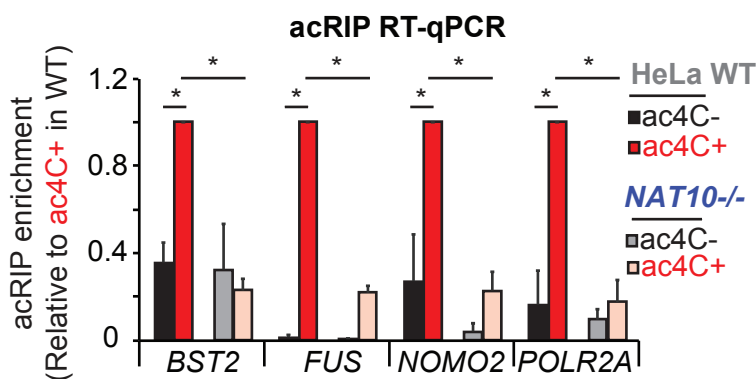

**F** NAT10 RIP and RT-qPCR NAT10-RIP Western blot

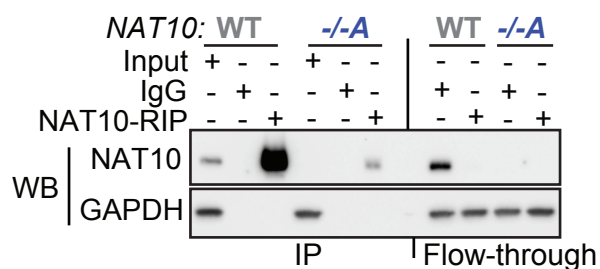

NAT10-RIP RT-qPCR

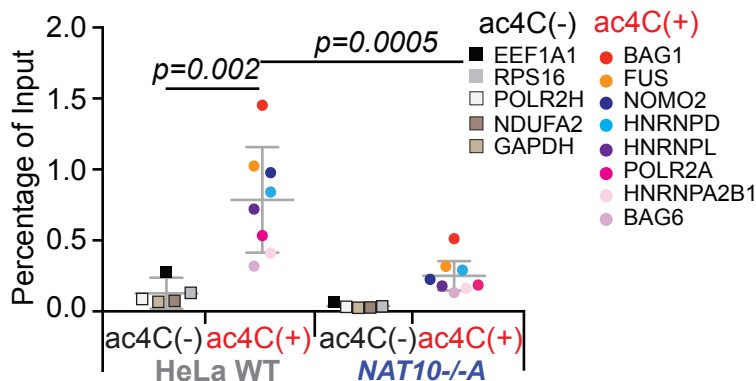

**A** Functional category analysis on the basis of differential gene expression in ac4C(-), ac4C(+) mRNAs and all dysregulated transcripts

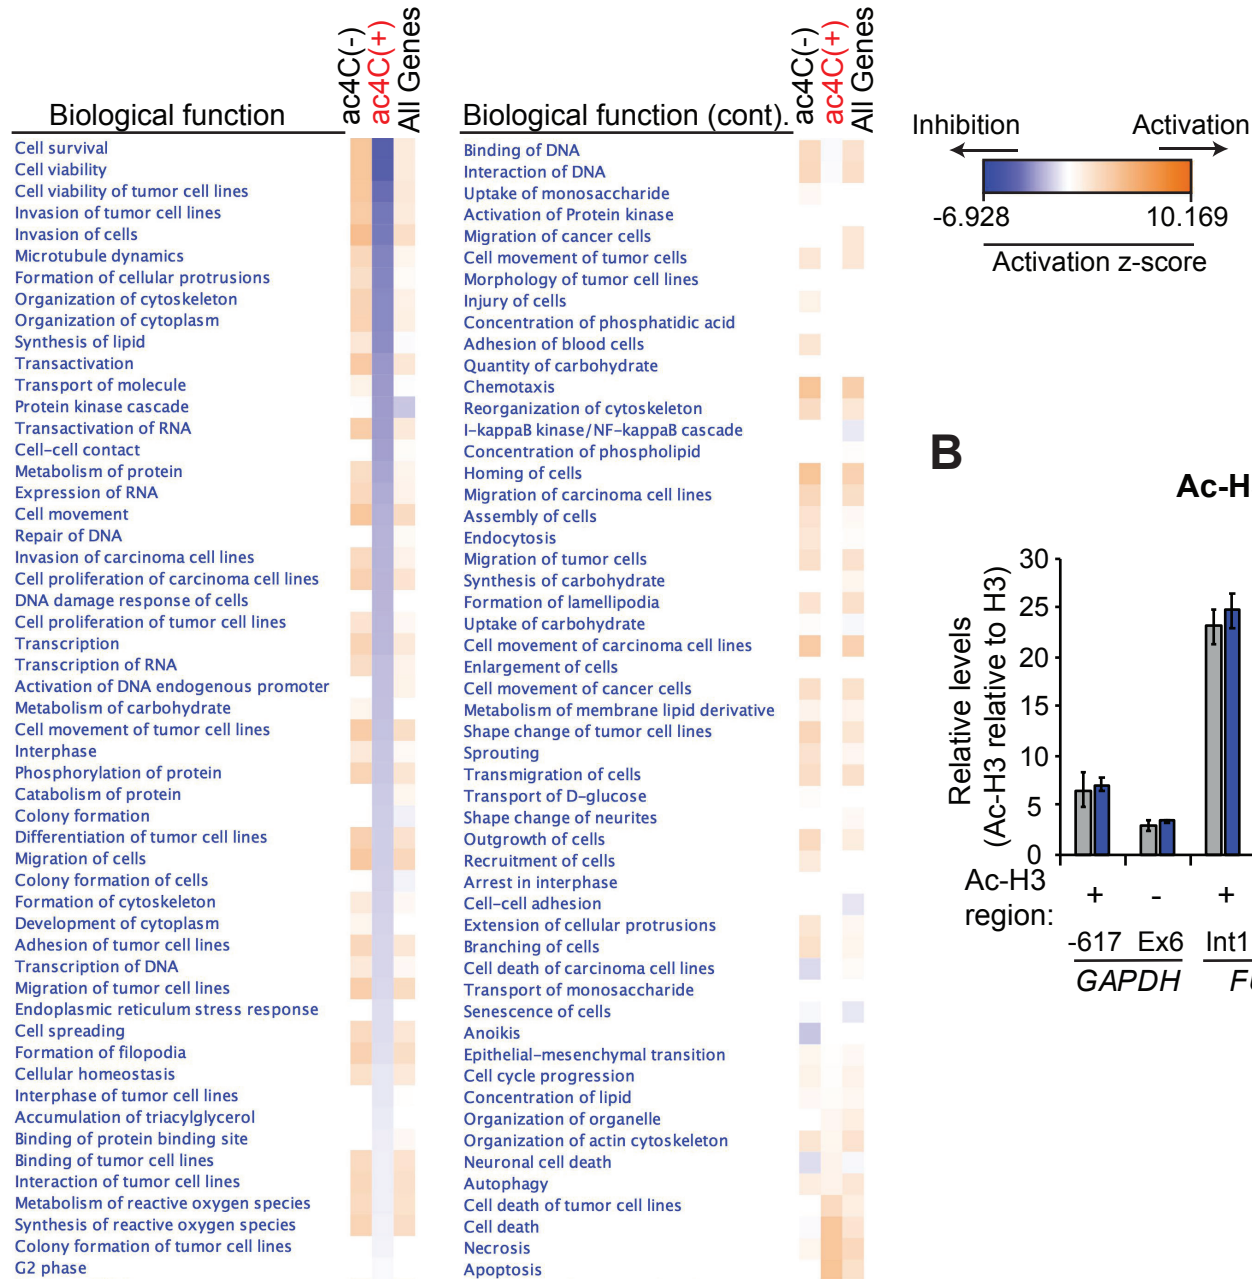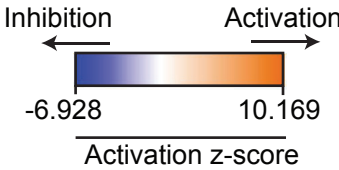

**B**

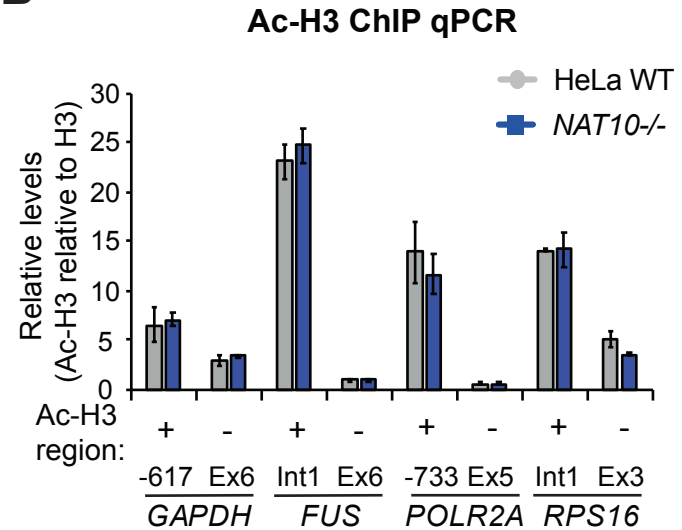

**A**

BRIC RT-qPCR in Parental and *NAT10*<sup>-/-</sup> HeLa Cells

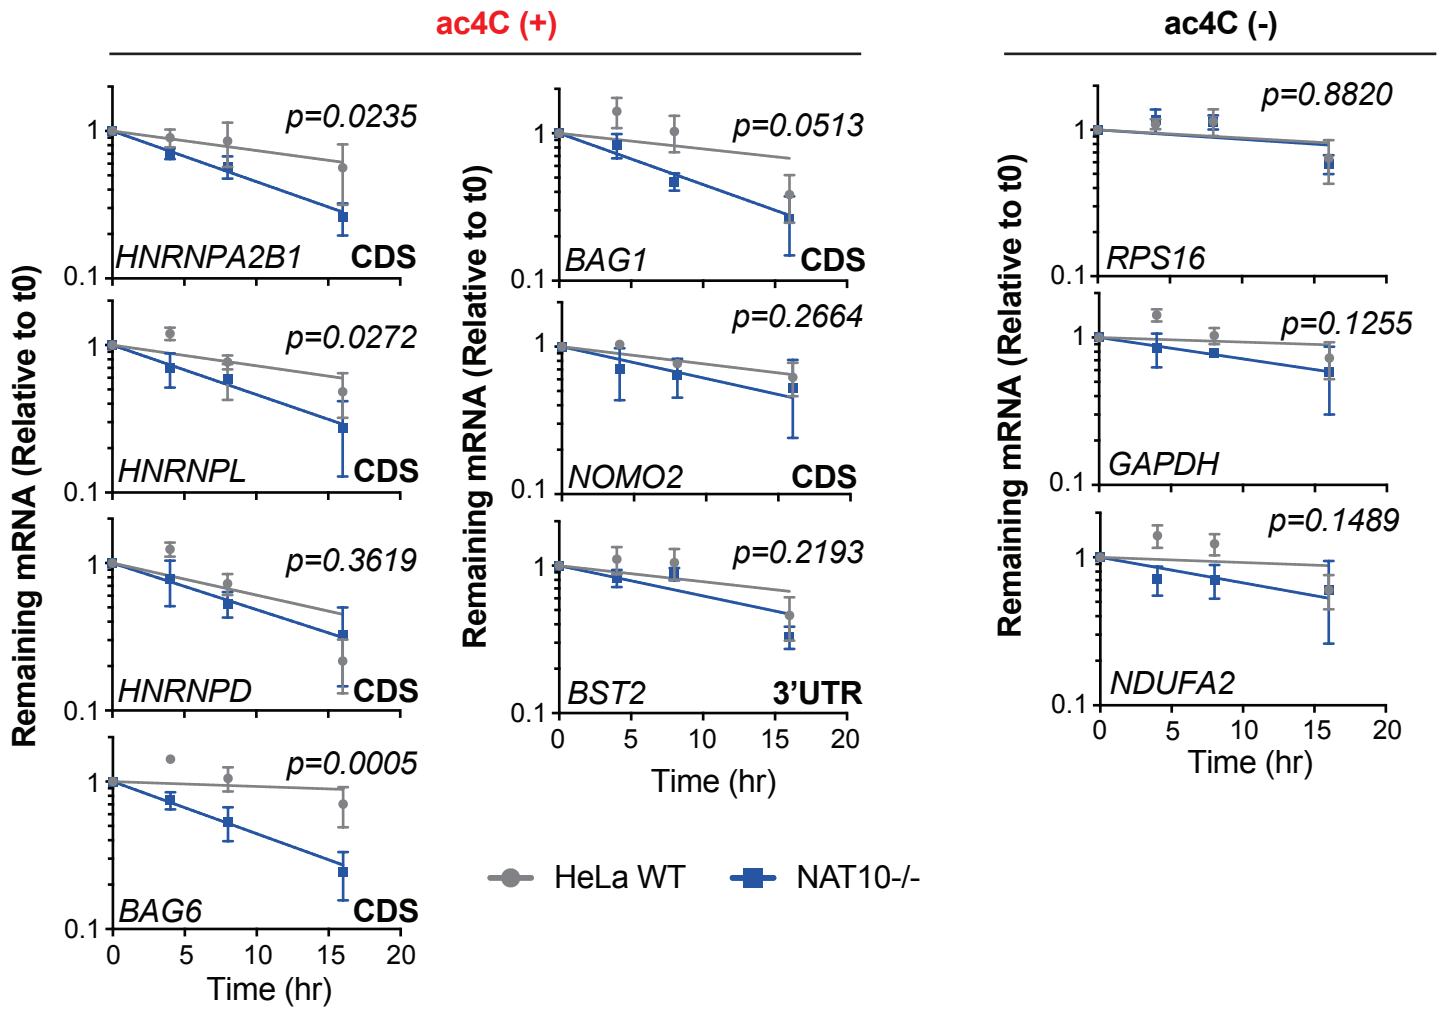

**B**

XRN-1 Digestion of *in vitro* Transcribed Probes

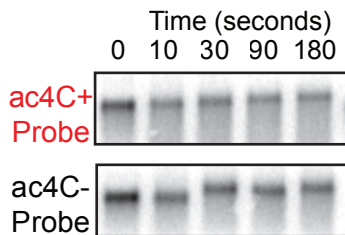

Arango et al., Figure S6, related to Figure 6

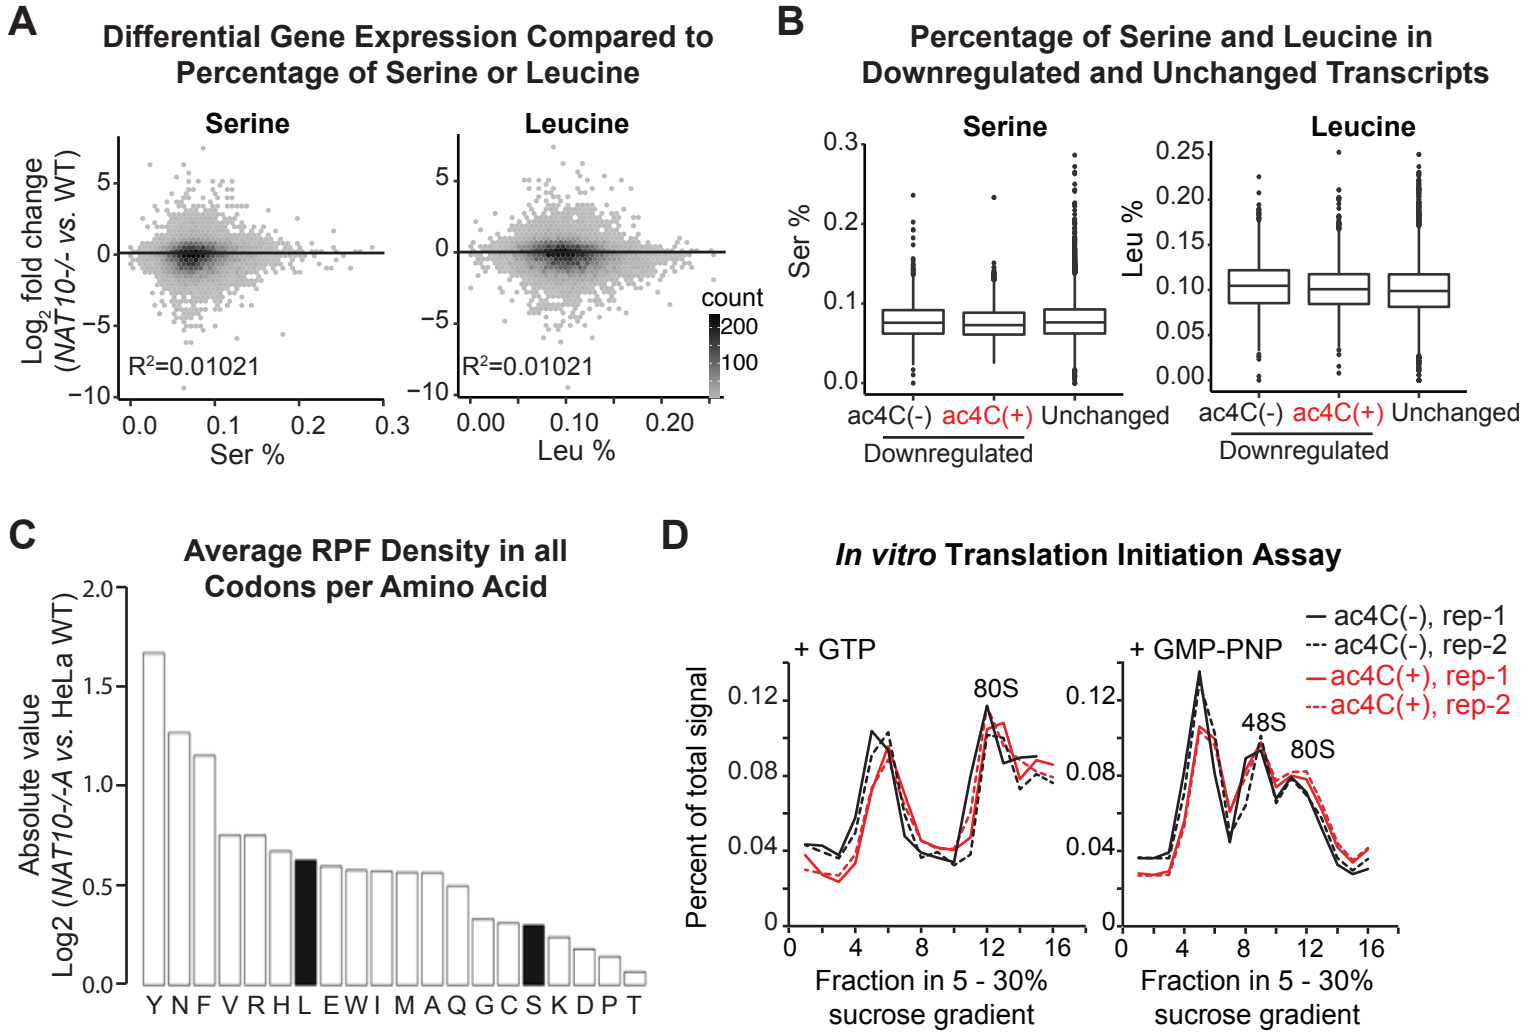

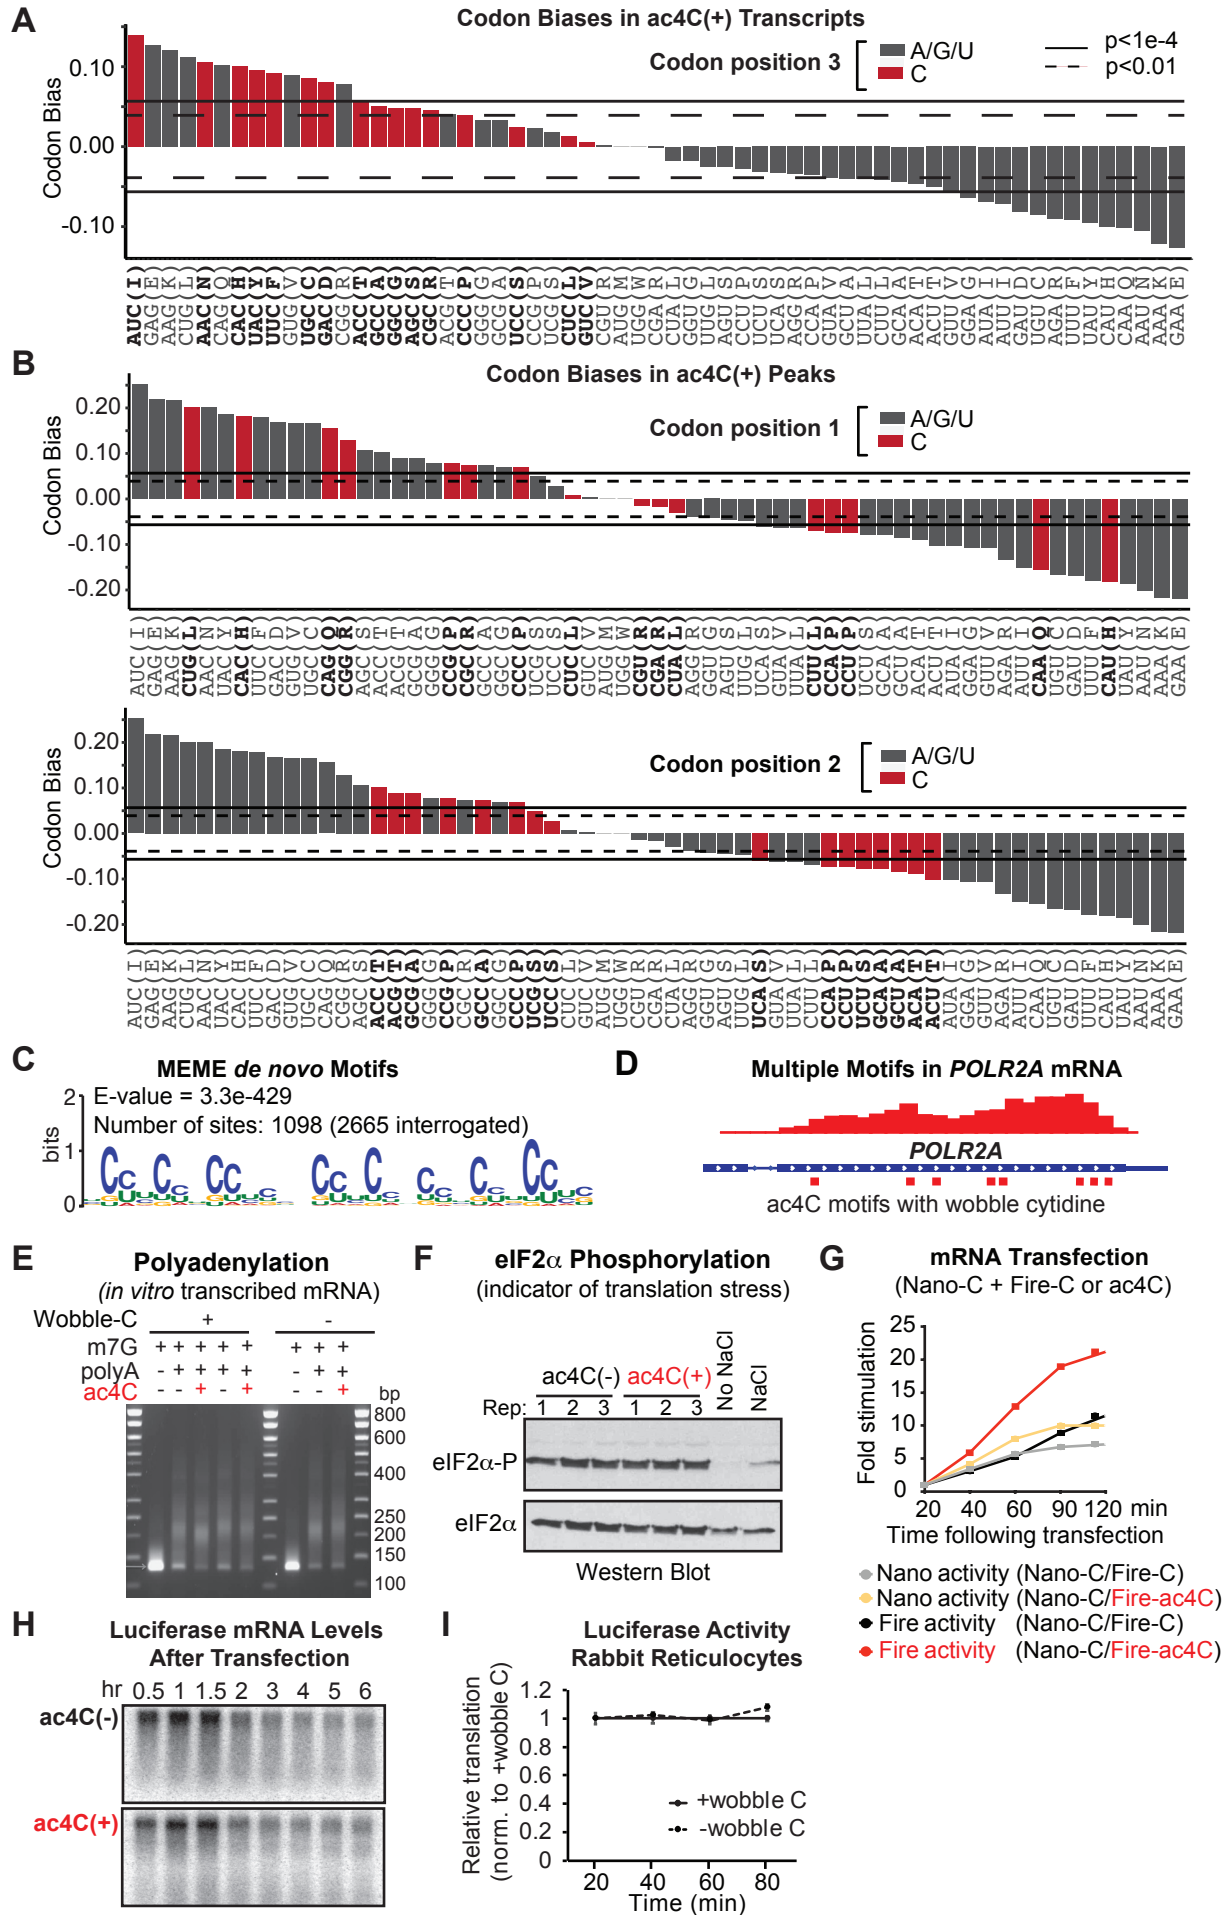

Supplement: NIHMS1509915-supplement-8.pdf [file NIHMS1509915-supplement-8.pdf]
