# Supplementary material
Source: PubMed Central journal article supplement (PMC6295233)
Supplement: NIHMS1509915-supplement-1.pdf [file NIHMS1509915-supplement-1.pdf]

**Table S1. Summary of sequencing experiments.**

| <b>ID / Flowcell</b>                | <b>Experiment</b>  | <b>Description</b>                                 | <b>Total reads</b> |
|-------------------------------------|--------------------|----------------------------------------------------|--------------------|
| CRVR5ANXX                           | RNA-seq            | <i>NAT10</i> <sup>-/-A</sup> Rep1                  | 70,870,840         |
|                                     |                    | <i>NAT10</i> <sup>-/-A</sup> Rep2                  | 64,105,560         |
|                                     |                    | HeLa WT Rep1                                       | 62,061,974         |
|                                     |                    | HeLa WT Rep2                                       | 52,654,720         |
| C9VRPANXX                           | acRIP-Seq<br>Rep 1 | HeLa WT IgG IP                                     | 117,322,836        |
|                                     |                    | <i>NAT10</i> <sup>-/-A</sup> and <i>C</i> Input    | 92,193,132         |
|                                     |                    | HeLa WT ac4C RIP                                   | 108,156,900        |
|                                     |                    | <i>NAT10</i> <sup>-/-A</sup> and <i>C</i> ac4C RIP | 94,943,490         |
|                                     |                    | HeLa WT Input                                      | 89,620,366         |
| CB7Y4ANXX                           | acRIP-Seq<br>Rep 2 | HeLa WT Input                                      | 87,824,004         |
|                                     |                    | HeLa WT acRIP                                      | 113,041,578        |
|                                     |                    | <i>NAT10</i> <sup>-/-A</sup> Input                 | 98,345,548         |
|                                     |                    | <i>NAT10</i> <sup>-/-A</sup> acRIP                 | 80,770,464         |
| HHCYBGX2,<br>HHJ3BGX2,<br>HHJHGBGX2 | Ribo-Seq           | HeLa WT Rep-1 Ribo-footprint                       | 147,784,518        |
|                                     |                    | HeLa WT Rep-2 Ribo-footprint                       | 156,328,500        |
|                                     |                    | <i>NAT10</i> <sup>-/-A</sup> Rep-1 Ribo-footprint  | 180,218,024        |
|                                     |                    | <i>NAT10</i> <sup>-/-A</sup> Rep-2 Ribo-footprint  | 178,700,707        |
|                                     |                    | HeLa WT Rep-1 Ctrl                                 | 81,676,459         |
|                                     |                    | HeLa WT Rep-2 Ctrl                                 | 75,982,588         |
|                                     |                    | <i>NAT10</i> <sup>-/-A</sup> Rep-1 Ctrl            | 74,935,693         |
|                                     |                    | <i>NAT10</i> <sup>-/-A</sup> Rep-2 Ctrl            | 84,636,027         |
| CBT9PANXX,<br>CBU89ANXX             | BRIC-Seq           | HeLa Parental WT Rep-1 T0                          | 71,381,686         |
|                                     |                    | HeLa Parental WT Rep-1 T2                          | 193,753,944        |
|                                     |                    | HeLa Parental WT Rep-1 T4                          | 73,353,064         |
|                                     |                    | HeLa Parental WT Rep-1 T8                          | 83,199,216         |
|                                     |                    | HeLa Parental WT Rep-1 T16                         | 88,427,426         |
|                                     |                    | HeLa Parental WT Rep-2 T0                          | 84,793,404         |
|                                     |                    | HeLa Parental WT Rep-2 T2                          | 62,455,242         |
|                                     |                    | HeLa Parental WT Rep-2 T4                          | 62,828,448         |
|                                     |                    | HeLa Parental WT Rep-2 T8                          | 64,225,912         |
|                                     |                    | HeLa Parental WT Rep-2 T16                         | 61,473,798         |
|                                     |                    | <i>NAT10</i> <sup>-/-A</sup> 0hr                   | 71,109,080         |
|                                     |                    | <i>NAT10</i> <sup>-/-A</sup> 16hr                  | 81,980,178         |
|                                     |                    | <i>NAT10</i> <sup>-/-A</sup> 2hr                   | 78,753,196         |
|                                     |                    | <i>NAT10</i> <sup>-/-A</sup> 4hr                   | 77,351,296         |
|                                     |                    | <i>NAT10</i> <sup>-/-A</sup> 8hr                   | 71,572,478         |
|                                     |                    | <i>NAT10</i> <sup>-/-A-2</sup> 0hr                 | 58,854,752         |
|                                     |                    | <i>NAT10</i> <sup>-/-A-2</sup> 2hr                 | 79,710,618         |
|                                     |                    | <i>NAT10</i> <sup>-/-A-2</sup> 4hr                 | 71,609,264         |
|                                     |                    | <i>NAT10</i> <sup>-/-A-2</sup> 8hr                 | 80,302,838         |
|                                     |                    | <i>NAT10</i> <sup>-/-A-2</sup> 16hr                | 79,270,294         |
